# Supplementary material for: Insight into anthropogenic forcing on coastal upwelling off south-central Chile
Source: Oxford University Press journal article supplement (doi:10.1525/elementa.314), 2018-01-01
Supplement: elementa-6-314-s6.docx [file elementa-6-314-s6.docx]

Table S1. List of Global Climate Models used in this research.

| **Institution** | **Model** |
| --- | --- |
| Commonwealth Scientific and Industrial Research Organization and Bureau of Meteorology, Australia | ACCESS1-0  ACCESS1-3 |
| Beijing Climate Center, China Meteorological Administration, China | bcc-csm1-1  bcc-csm1-1-m |
| College of Global Change and Earth System Science, Beijing Normal University, China | BNU-ESM |
| National Center for Atmospheric Research, USA | CCSM4  CESM1-CAM5 |
| Centro Euro-Mediterraneo per I Cambiamenti Climatici, Italia | CMCC-CM |
| Centre National de Recherches Meteorologiques, Centre Europeen de Recherche et Formation Avance en Calcul Scientifique, France | CNRM-CM5 |
| Commonwealth Scientific and Industrial Research Organization in collaboration with Queensland Climate Change Centre of Excellence, Australia | CSIRO-Mk3-6-0 |
| EC-EARTH consortium | EC-EARTH |
| LASG, Institute of Atmospheric Physics, Chinese Academy of Sciences and CESS, Tsinghua University, China | FGOALS-g2 |
| LASG, Institute of Atmospheric Physics, Chinese Academy of Sciences, China | FGOALS-s2 |
| NASA Goddard Institute for Space Studies, USA | GISS-E2-R |
| Met Office Hadley Centre, UK | HadGEM2-AO |
| Institut Pierre-Simon Laplace, France | IPSL-CM5A-LR  IPSL-CM5A-MR  IPSL-CM5B-LR |
| Agency for Marine-Earth Science and Technology, Atmosphere and Ocean Research Institute (University of Tokyo), and National Institute for Environmental Studies, Japan | MIROC5  MIROC-ESM |
| Max-Planck-Institut fur Meteorologie, Germany | MPI-ESM-LR  MPI-ESM-MR |
| Norwegian Climate Centre, Norway | NorESM1-M |
