# Supplementary figures and images for: Insight into anthropogenic forcing on coastal upwelling off south-central Chile
Source: Oxford University Press journal article supplement (doi:10.1525/elementa.314), 2018-01-01

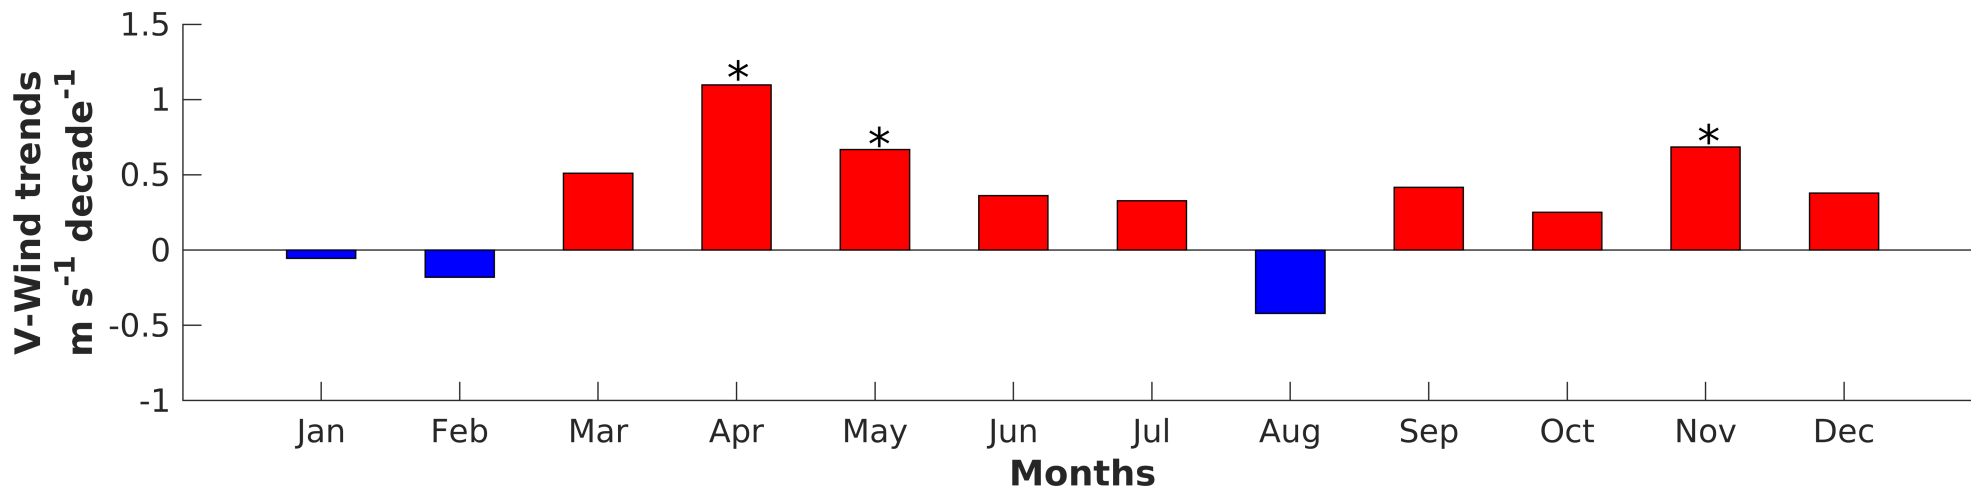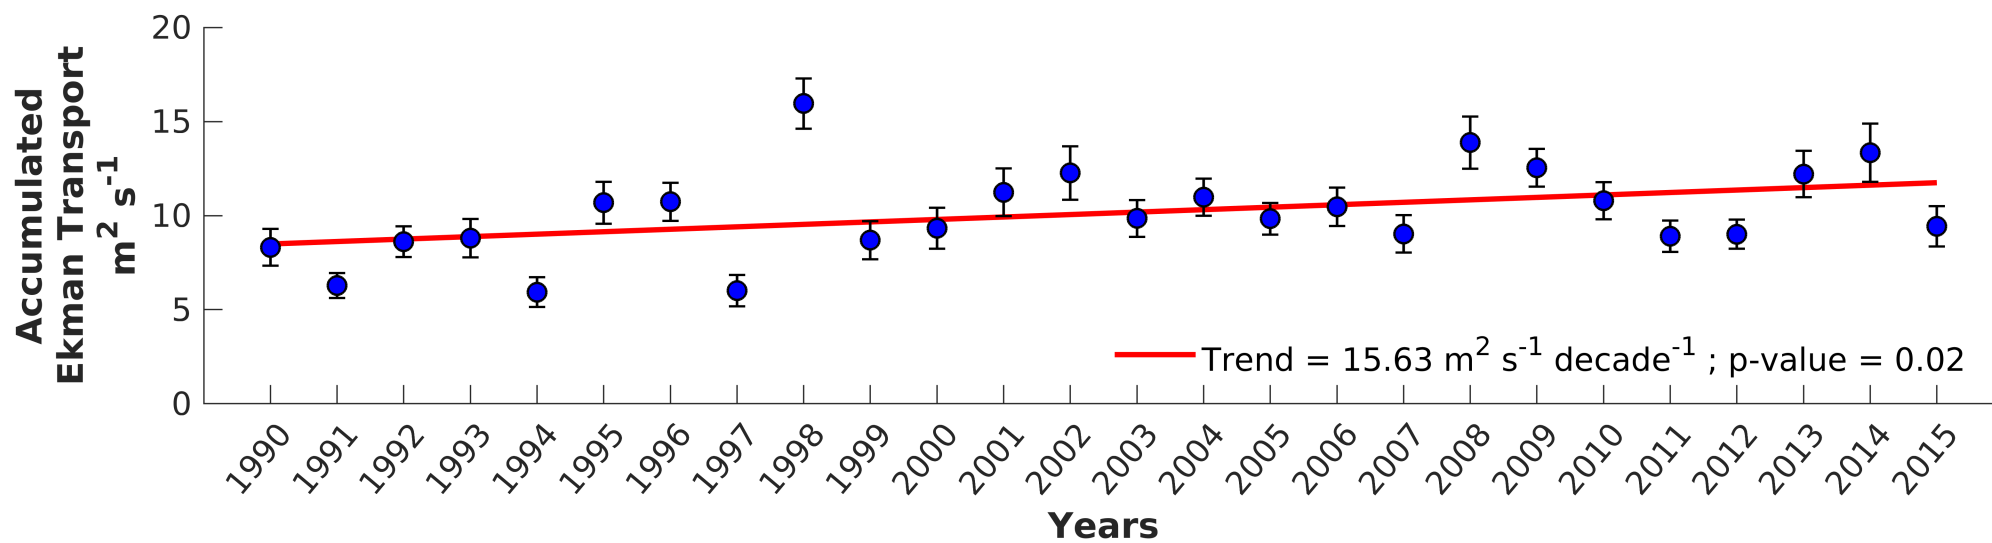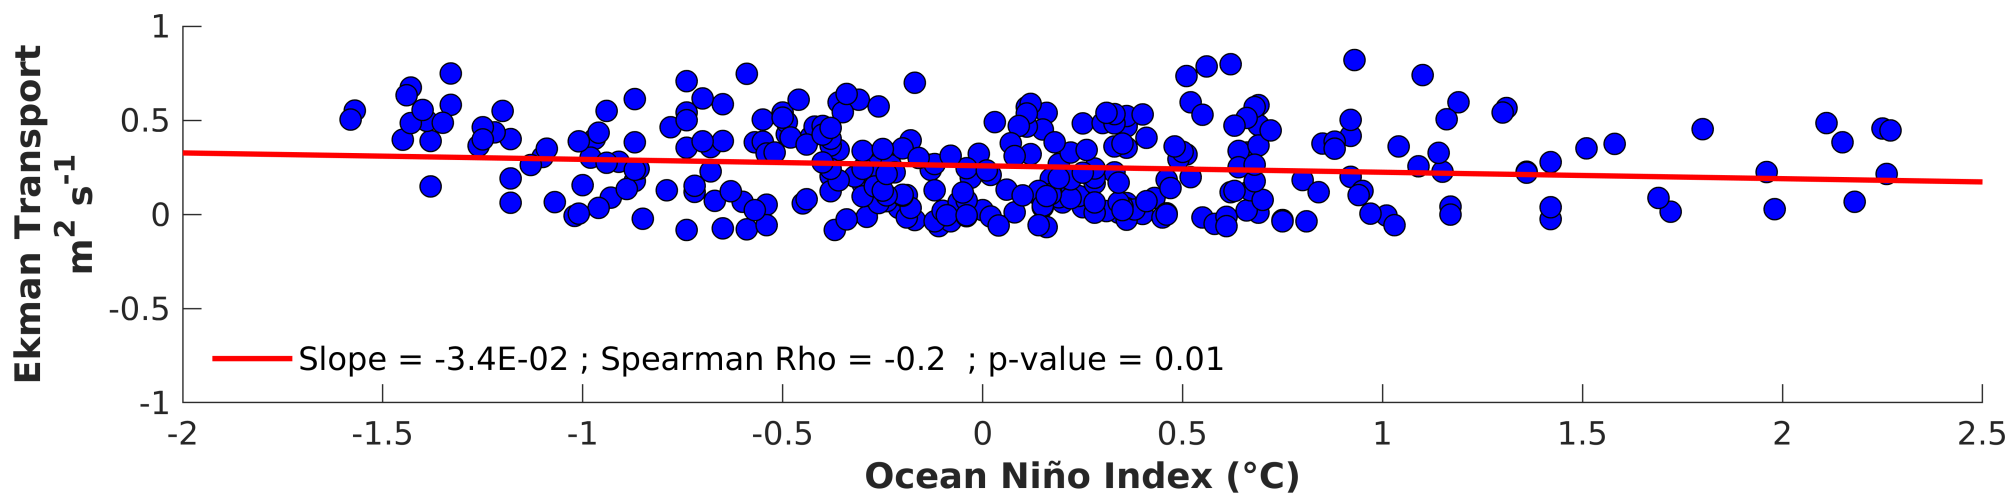

Supplement: elementa-6-314-s2.pdf [file elementa-6-314-s2.pdf]
